OBSERVATIONS

**Delay in Diagnosis of Diabetes Is Not the Patient's Fault**

Previous reports have suggested that onset of diabetes occurs 4–7 years before clinical diagnosis (1). However, it is not known whether delay in diagnosis reflects patient factors, such as lack of medical visits or glucose measurements, or provider factors, such as clinical inertia (2).

We reviewed the charts of 50 patients selected for delayed diagnosis at the Atlanta Veterans Affairs (VA) Medical Center. Date of first diabetes range hyperglycemia (D1) was defined by outpatient fasting plasma glucose (0630–1000 h)  $\geq 126$  mg/dl, random glucose (1001–1800 h)  $\geq 200$  mg/dl, 2-h post-oral glucose tolerance test (OGTT) glucose  $\geq 200$  mg/dl, or A1C  $\geq 6.5\%$ . Date of second diabetes range hyperglycemia (D2) was defined by having any two of these values or any value twice. The date of diagnosis was defined by initial use of ICD-9 code 250.xx at a primary care visit, any use of the code twice, and/or initial prescription of a diabetes drug—criteria establishing the disease (3). Inpatient values were excluded to avoid confounding by stress hyperglycemia.

The patients were all men, with average age  $66 \pm 10$  years (mean  $\pm$  SD). The delay between initial hyperglycemia (D1) and the diagnosis date averaged  $3.7 \pm 1.1$  years, and the delay after D2 averaged  $1.8 \pm 1.7$  years. During the delay from D2 to diagnosis (four patients had no D2), patients averaged  $9 \pm 11$  outpatient plasma glucose and  $2 \pm 2$  A1C measurements; for each patient 46% of the fasting plasma glucose values were  $>125$  mg/dl, 20% of the random glucose values were  $\geq 200$  mg/dl, and 62% of the A1C values were  $\geq 6.5\%$ . During the delay after D2, patients averaged  $8 \pm 8$  outpatient visits, of which  $5 \pm 4$  were to primary care. Patients were seen by a wide range of various primary care physicians, nurse specialists,

and physician assistants. In 60% of cases, the primary care provider's note mentioned hyperglycemia without a diagnosis or follow-up plan, and often subsequent notes would not mention glucose again despite continued elevations; 46% of patients had glucose levels  $>125$  mg/dl entered into the note without mention of hyperglycemia. Only two patients had OGTTs (both with normal fasting but elevated 2-h glucose levels). Only five patients (10%) were recorded as missing scheduled appointments, and there was no documentation of patients missing blood tests.

Our review reveals that delay in diagnosis of diabetes cannot be attributed to patient nonadherence as a result of missing appointments or blood tests. To the contrary, there were multiple opportunities when a diagnosis could have been but was not made, suggesting provider factors (clinical inertia) as the cause of delay.

This review included only 50 male Atlanta VA Medical Center patients and therefore may have limited generalizability. However, the findings suggest that practitioners need to improve their response to glycemic indexes that indicate that diabetes is likely, particularly random plasma glucose  $\geq 125$  mg/dl (4) and A1C  $\geq 6.5\%$  (5). Although OGTTs were rare, abnormal results were followed quickly by a diagnosis, implying that elevated glucose levels may also be more likely to prompt diagnosis if tests are ordered for screening rather than routine chemistry. Further analysis of the basis for the delay in diagnosis may lead to better approaches to aid recognition of diabetes early in its natural history.

LISA-ANN FRASER, MD<sup>1</sup>  
 JENNIFER TWOMBLY, MD, PHD<sup>2</sup>  
 MING ZHU, MS<sup>3</sup>  
 QI LONG, PHD<sup>3</sup>  
 JOHN J. HANFELT, PHD<sup>3</sup>  
 K.M. VENKAT NARAYAN, MD, MPH<sup>4,5</sup>  
 PETER W.F. WILSON, MD<sup>6,7</sup>  
 LAWRENCE S. PHILLIPS, MD<sup>2,7</sup>

From the <sup>1</sup>Division of Endocrinology and Metabolism, Department of Medicine, University of Western Ontario, London, Ontario, Canada; the <sup>2</sup>Division of Endocrinology and Metabolism, Emory University School of Medicine, Atlanta, Georgia; the <sup>3</sup>Department of Biostatistics and

Bioinformatics, Rollins School of Public Health, Emory University, Atlanta, Georgia; the <sup>4</sup>Hubert Department of Global Health, Rollins School of Public Health, Emory University, Atlanta, Georgia; the <sup>5</sup>Department of Medicine, Emory University School of Medicine, Atlanta, Georgia; the <sup>6</sup>Division of Cardiology, Emory University School of Medicine, Atlanta, Georgia; and the <sup>7</sup>Veterans Administration Medical Center, Decatur, Georgia.

Corresponding author: Lawrence S. Phillips, medlsp@emory.edu.

DOI: 10.2337/dc09-1129

© 2010 by the American Diabetes Association. Readers may use this article as long as the work is properly cited, the use is educational and not for profit, and the work is not altered. See <http://creativecommons.org/licenses/by-nc-nd/3.0/> for details.

**Acknowledgments**— This work was supported in part by National Institutes of Health Award DK066204 and VA Health Services Research and Development Awards SHP 08-144 and IIR 07-138.

No potential conflicts of interest relevant to this article were reported.

We thank Christine Jasien, Johnita Byrd-Sellers, Jane Caudle, and Circe Tsui (systems and database support), as well as Martha Forrester, Jennifer Jeong, Margaret Jenkins, and Jennifer Michaels (research nurse and research coordinator support) for their assistance.

References

- Harris MI, Klein R, Welborn TA, Knuiman MW. Onset of NIDDM occurs at least 4–7 yr before clinical diagnosis. *Diabetes Care* 1992;15:815–819
- Phillips LS, Branch WT, Cook CB, Doyle JP, El-Kebbi IM, Gallina DL, Miller CD, Ziemer DC, Barnes CS. Clinical inertia. *Ann Int Med* 2001;135:825–834
- Miller DR, Safford MM, Pogach LM. Who has diabetes? Best estimates of diabetes prevalence in the Department of Veterans Affairs based on computerized patient data. *Diabetes Care* 2004;27(Suppl. 2):B10–B21
- Ziemer DC, Kolm P, Foster JK, Weintraub WS, Vaccarino V, Rhee MK, Varughese RM, Tsui CW, Koch DD, Twombly JG, Narayan KM, Phillips LS. Random plasma glucose in serendipitous screening for glucose intolerance: screening for impaired glucose tolerance study 2. *J Gen Intern Med* 2008;23:528–535
- International Expert Committee. International expert committee report on the role of the A1c assay in the diagnosis of diabetes. *Diabetes Care* 2009;32:1327–1334

Downloaded from <http://ada.silverchair.com/care/article-pdf/33/1/e10/604924/zdc00110000e10.pdf> by guest on 17 April 2024
